# Supplementary material
Source: PubMed Central journal article supplement (PMC7655370)
Supplement: 18-00386.pdf [file 18-00386.pdf]

**On-line Table 1: Baseline and follow-up characteristics<sup>a</sup>**

| Characteristic                                                                    | This Study (n = 216) | MR CLEAN (n = 500) |
|-----------------------------------------------------------------------------------|----------------------|--------------------|
| Age (mean) (SD) (yr)                                                              | 62.9 (12.8)          | 64.9 (13.8)        |
| Male sex (No.) (%)                                                                | 136 (63)             | 292 (58.4)         |
| Diabetes mellitus (No.) (%)                                                       | 17 (7.9)             | 68 (13.6)          |
| Atrial fibrillation (No.) (%)                                                     | 54 (24)              | 135 (27.0)         |
| Previous stroke (No.) (%)                                                         | 0                    | 54 (10.8)          |
| Prestroke mRS >0 (No.) (%)                                                        | 0                    | 96 (19.2)          |
| Intracranial arterial occlusion (No.) (%)                                         |                      |                    |
| Intracranial internal carotid artery                                              | 4 (1.9)              | 4 (0.8)            |
| Internal carotid artery with involvement of the M1 middle cerebral artery segment | 66 (30.6)            | 134 (26.9)         |
| M1 middle cerebral artery segment                                                 | 128 (59.3)           | 319 (63.9)         |
| M2 middle cerebral artery segment                                                 | 15 (6.9)             | 39 (7.8)           |
| A1 or A2 anterior cerebral artery segment                                         | 2 (0.9)              | 3 (0.6)            |
| Treatment (No.) (%)                                                               |                      |                    |
| Intravenous treatment only                                                        | 105 (48.6)           | 257 (51.4)         |
| Intra-arterial treatment only                                                     | 7 (5.6)              | 30 (6.0)           |
| Intravenous and intra-arterial treatment                                          | 96 (44.4)            | 187 (37.4)         |
| Conservative treatment                                                            | 8 (3.7)              | 26 (5.2)           |
| Time from stroke onset to treatment (mean) (SD) (min)                             | 102.1 (61.1)         | 106.9 (64.6)       |
| Recanalization <sup>b</sup> (No.) (%)                                             | 113 (52.3)           | 289 (67.1)         |
| mTICI score (No.) (%)                                                             |                      |                    |
| TICI 0–2a                                                                         | 30 (13.9)            | 81 (41.1)          |
| TICI 2b–3                                                                         | 53 (24.5)            | 116 (58.9)         |
| mAOL score (No.) (%)                                                              |                      |                    |
| 0                                                                                 | 28 (13.0)            | 92 (23.4)          |
| 1                                                                                 | 13 (6.0)             | 26 (6.6)           |
| 2                                                                                 | 36 (16.7)            | 65 (16.5)          |
| 3                                                                                 | 107 (49.5)           | 211 (53.6)         |
| NIHSS score 1 week after stroke (No.) (%)                                         |                      |                    |
| 0–4                                                                               | 65 (30.1)            | 114 (26.8)         |
| 5–15                                                                              | 81 (37.5)            | 154 (36.2)         |
| 16–20                                                                             | 41 (19.0)            | 97 (22.8)          |
| 21–42                                                                             | 25 (11.6)            | 61 (14.3)          |
| mRS score at 90 days (No.) (%)                                                    |                      |                    |
| 0                                                                                 | 5 (2.3)              | 7 (1.4)            |
| 1                                                                                 | 23 (10.6)            | 36 (7.2)           |
| 2                                                                                 | 52 (24.1)            | 84 (16.8)          |
| 3                                                                                 | 50 (23.1)            | 87 (17.4)          |
| 4                                                                                 | 61 (28.1)            | 133 (26.6)         |
| 5                                                                                 | 25 (11.6)            | 45 (9.0)           |
| 6                                                                                 | 0                    | 108 (21.6)         |
| Favorable outcome at 90 days (mRS < 3) (No.) (%)                                  | 80 (37.0)            | 127 (25.4)         |

**Note:**—mTICI indicates modified Thrombolysis in Cerebral Infarction; mAOL, modified arterial occlusive lesion.

<sup>a</sup> mRS score: 0, no symptoms at all; 1, no significant disability despite symptoms; 2, slight disability; 3, moderate disability; 4, moderately severe disability; 5, severe disability; 6, dead. mTICI score: 0, no perfusion; 1, penetration with minimal perfusion; 2, partial perfusion; 2a, only partial filling (<2/3) of the entire vascular territory is visualized; 2b, complete filling of all the expected vascular territory is visualized, but the filling is slower than normal; grade 3, complete perfusion. mAOL score: 0, no recanalization of the primary occlusion; 1, incomplete or partial recanalization of the primary occlusion with no distal flow; 2, incomplete or partial recanalization of the primary occlusion with distal flow; 3, complete recanalization of the primary occlusion with distal flow. NIHSS score: 0, no stroke symptoms; 1–4, minor stroke; 5–15, moderate stroke; 16–20, moderate-to-severe stroke; 21–42, severe stroke.

<sup>b</sup> Recanalization defined as mAOL score  $\geq$  2 or mTICI 2b–3.

**On-line Table 2: Results from VLSM calculated for each hemisphere<sup>a</sup>**

| Region                                                | Mean | Median | SD   | Max  | Min  |
|-------------------------------------------------------|------|--------|------|------|------|
| Left superior longitudinal fasciculus                 | 4.85 | 4.86   | 0.50 | 6.21 | 3.06 |
| Left corticospinal tract                              | 4.45 | 4.42   | 1.53 | 8.06 | 2.36 |
| Left uncinate fasciculus                              | 4.44 | 4.19   | 1.12 | 7.04 | 2.93 |
| Left central opercular cortex                         | 4.37 | 4.48   | 0.97 | 6.81 | 2.43 |
| Right corticospinal tract                             | 4.32 | 4.45   | 0.86 | 6.23 | 2.39 |
| Left inferior fronto-occipital fasciculus             | 4.26 | 4.04   | 1.23 | 7.14 | 2.38 |
| Left anterior thalamic radiation                      | 4.09 | 4.10   | 0.71 | 6.58 | 2.36 |
| Right frontal operculum cortex                        | 4.08 | 4.06   | 0.39 | 5.06 | 2.66 |
| Left planum temporale                                 | 4.03 | 4.05   | 0.41 | 5.30 | 2.52 |
| Left Heschl gyrus                                     | 4.00 | 3.97   | 0.50 | 5.41 | 2.68 |
| Left caudate                                          | 3.96 | 3.97   | 0.65 | 5.78 | 2.37 |
| Right central opercular cortex                        | 3.92 | 3.95   | 0.54 | 5.79 | 2.48 |
| Left supramarginal gyrus, anterior division           | 3.91 | 3.94   | 0.47 | 5.16 | 2.38 |
| Left postcentral gyrus                                | 3.87 | 4.05   | 0.68 | 5.54 | 2.38 |
| Left putamen                                          | 3.87 | 3.64   | 0.98 | 6.85 | 2.36 |
| Left cerebral white matter                            | 3.86 | 3.74   | 0.97 | 8.24 | 2.36 |
| Left planum polare                                    | 3.83 | 3.89   | 0.64 | 5.35 | 2.38 |
| Left parietal operculum cortex                        | 3.81 | 3.82   | 0.45 | 5.42 | 2.49 |
| Left superior temporal gyrus, anterior division       | 3.79 | 3.80   | 0.35 | 4.65 | 2.46 |
| Left insular cortex                                   | 3.79 | 3.71   | 0.82 | 6.43 | 2.36 |
| Left pallidum                                         | 3.77 | 3.77   | 0.62 | 5.54 | 2.37 |
| Left precentral gyrus                                 | 3.74 | 3.84   | 0.67 | 5.42 | 2.38 |
| Left thalamus                                         | 3.72 | 3.62   | 0.76 | 6.03 | 2.37 |
| Left supramarginal gyrus, posterior division          | 3.69 | 3.70   | 0.49 | 5.10 | 2.38 |
| Right cerebral white matter                           | 3.68 | 3.60   | 0.79 | 6.97 | 2.37 |
| Right parietal operculum cortex                       | 3.67 | 3.64   | 0.57 | 5.16 | 2.39 |
| Left inferior frontal gyrus, pars opercularis         | 3.65 | 3.73   | 0.51 | 5.24 | 2.37 |
| Right inferior fronto-occipital fasciculus            | 3.63 | 3.64   | 0.78 | 5.59 | 2.39 |
| Right Heschl gyrus                                    | 3.62 | 3.58   | 0.63 | 6.31 | 2.49 |
| Right hippocampus                                     | 3.61 | 3.57   | 0.68 | 5.81 | 2.37 |
| Right inferior longitudinal fasciculus                | 3.59 | 3.55   | 0.58 | 5.75 | 2.38 |
| Right thalamus                                        | 3.59 | 3.45   | 0.77 | 6.04 | 2.39 |
| Right pallidum                                        | 3.56 | 3.58   | 0.61 | 5.37 | 2.38 |
| Right temporal fusiform cortex, posterior division    | 3.56 | 3.69   | 0.67 | 4.93 | 2.39 |
| Right amygdala                                        | 3.53 | 3.52   | 0.64 | 5.55 | 2.38 |
| Left cerebral cortex                                  | 3.52 | 3.43   | 0.74 | 6.81 | 2.36 |
| Left amygdala                                         | 3.51 | 3.41   | 0.75 | 6.25 | 2.36 |
| Right planum polare                                   | 3.51 | 3.47   | 0.54 | 5.19 | 2.38 |
| Right superior longitudinal fasciculus                | 3.48 | 3.45   | 0.55 | 5.27 | 2.39 |
| Right insular cortex                                  | 3.45 | 3.35   | 0.66 | 6.10 | 2.38 |
| Right inferior frontal gyrus, pars opercularis        | 3.43 | 3.33   | 0.58 | 5.37 | 2.37 |
| Left angular gyrus                                    | 3.31 | 3.29   | 0.39 | 4.30 | 2.38 |
| Right anterior thalamic radiation                     | 3.30 | 3.16   | 0.69 | 5.96 | 2.37 |
| Right frontal orbital cortex                          | 3.29 | 3.25   | 0.52 | 5.09 | 2.37 |
| Right cerebral cortex                                 | 3.27 | 3.19   | 0.61 | 6.31 | 2.37 |
| Right planum temporale                                | 3.22 | 3.07   | 0.58 | 4.79 | 2.37 |
| Left inferior longitudinal fasciculus                 | 3.21 | 3.16   | 0.50 | 4.66 | 2.36 |
| Left middle temporal gyrus, anterior division         | 3.21 | 3.17   | 0.45 | 4.50 | 2.38 |
| Right inferior frontal gyrus, pars triangularis       | 3.18 | 3.21   | 0.44 | 4.67 | 2.39 |
| Right uncinate fasciculus                             | 3.18 | 3.39   | 0.60 | 3.64 | 2.51 |
| Right precentral gyrus                                | 3.16 | 3.11   | 0.51 | 5.19 | 2.39 |
| Right superior temporal gyrus, anterior division      | 3.09 | 3.04   | 0.37 | 4.33 | 2.37 |
| Right angular gyrus                                   | 3.09 | 3.04   | 0.47 | 4.60 | 2.39 |
| Left hippocampus                                      | 3.06 | 2.99   | 0.47 | 4.86 | 2.36 |
| Right middle frontal gyrus                            | 3.06 | 2.94   | 0.52 | 4.63 | 2.39 |
| Left frontal pole                                     | 3.05 | 2.98   | 0.45 | 4.30 | 2.38 |
| Right caudate                                         | 3.03 | 2.86   | 0.52 | 4.69 | 2.38 |
| Left lateral occipital cortex, superior division      | 3.02 | 2.91   | 0.50 | 4.22 | 2.38 |
| Right temporal pole                                   | 3.01 | 2.89   | 0.47 | 4.65 | 2.37 |
| Left inferior temporal gyrus, posterior division      | 2.99 | 2.91   | 0.29 | 3.50 | 2.62 |
| Right lateral occipital cortex, superior division     | 2.96 | 2.91   | 0.42 | 4.00 | 2.39 |
| Right frontal pole                                    | 2.95 | 2.86   | 0.43 | 4.55 | 2.39 |
| Right inferior temporal gyrus, temporo-occipital part | 2.95 | 2.96   | 0.24 | 3.29 | 2.59 |
| Right middle temporal gyrus, temporo-occipital part   | 2.95 | 2.91   | 0.42 | 4.46 | 2.39 |
| Left frontal orbital cortex                           | 2.94 | 2.80   | 0.49 | 5.30 | 2.36 |

*Continued on next page*

On-line Table 2: Continued

| Region                                               | Mean | Median | SD   | Max  | Min  |
|------------------------------------------------------|------|--------|------|------|------|
| Right supramarginal gyrus, posterior division        | 2.93 | 2.86   | 0.38 | 4.18 | 2.39 |
| Left temporal pole                                   | 2.91 | 2.80   | 0.46 | 5.48 | 2.36 |
| Right inferior temporal gyrus, posterior division    | 2.91 | 2.79   | 0.41 | 4.01 | 2.41 |
| Right middle temporal gyrus, posterior division      | 2.90 | 2.86   | 0.37 | 4.45 | 2.39 |
| Left inferior frontal gyrus, pars triangularis       | 2.89 | 2.83   | 0.38 | 4.49 | 2.36 |
| Right subcallosal cortex                             | 2.85 | 2.79   | 0.21 | 3.09 | 2.69 |
| Right putamen                                        | 2.85 | 2.79   | 0.37 | 4.49 | 2.37 |
| Left middle temporal gyrus, temporo-occipital part   | 2.83 | 2.80   | 0.25 | 3.46 | 2.38 |
| Left middle frontal gyrus                            | 2.81 | 2.73   | 0.36 | 4.54 | 2.38 |
| Left inferior temporal gyrus, anterior division      | 2.79 | 2.65   | 0.35 | 3.50 | 2.38 |
| Left frontal operculum cortex                        | 2.78 | 2.74   | 0.27 | 3.91 | 2.37 |
| Right middle temporal gyrus, anterior division       | 2.78 | 2.77   | 0.26 | 3.73 | 2.39 |
| Right forceps minor                                  | 2.76 | 2.69   | 0.30 | 3.86 | 2.38 |
| Right lateral occipital cortex, inferior division    | 2.75 | 2.69   | 0.34 | 4.05 | 2.39 |
| Left middle temporal gyrus, posterior division       | 2.74 | 2.68   | 0.30 | 3.89 | 2.36 |
| Right supramarginal gyrus, anterior division         | 2.72 | 2.69   | 0.27 | 3.73 | 2.39 |
| Right postcentral gyrus                              | 2.70 | 2.64   | 0.29 | 4.59 | 2.39 |
| Left superior parietal lobule                        | 2.68 | 2.62   | 0.12 | 2.92 | 2.50 |
| Right parahippocampal gyrus, anterior division       | 2.67 | 2.51   | 0.34 | 3.38 | 2.41 |
| Left lateral occipital cortex, inferior division     | 2.63 | 2.62   | 0.15 | 3.06 | 2.38 |
| Left parahippocampal gyrus, anterior division        | 2.62 | 2.65   | 0.19 | 2.95 | 2.39 |
| Left accumbens                                       | 2.59 | 2.55   | 0.16 | 2.99 | 2.38 |
| Left subcallosal cortex                              | 2.59 | 2.62   | 0.14 | 2.91 | 2.39 |
| Right inferior temporal gyrus, anterior division     | 2.51 | 2.51   | 0.00 | 2.51 | 2.51 |
| Right superior parietal lobule                       | 2.41 | 2.41   | 0.00 | 2.41 | 2.41 |
| Right superior frontal gyrus                         | 0.00 | 0.00   | 0.00 | 0.00 | 0.00 |
| Right superior temporal gyrus, posterior division    | 0.00 | 0.00   | 0.00 | 0.00 | 0.00 |
| Right intracalcarine cortex                          | 0.00 | 0.00   | 0.00 | 0.00 | 0.00 |
| Right frontal medial cortex                          | 0.00 | 0.00   | 0.00 | 0.00 | 0.00 |
| Right juxtapositional lobule cortex                  | 0.00 | 0.00   | 0.00 | 0.00 | 0.00 |
| Right paracingulate gyrus                            | 0.00 | 0.00   | 0.00 | 0.00 | 0.00 |
| Right cingulate gyrus, anterior division             | 0.00 | 0.00   | 0.00 | 0.00 | 0.00 |
| Right cingulate gyrus, posterior division            | 0.00 | 0.00   | 0.00 | 0.00 | 0.00 |
| Right precuneus cortex                               | 0.00 | 0.00   | 0.00 | 0.00 | 0.00 |
| Right cuneal cortex                                  | 0.00 | 0.00   | 0.00 | 0.00 | 0.00 |
| Right parahippocampal gyrus, posterior division      | 0.00 | 0.00   | 0.00 | 0.00 | 0.00 |
| Right lingual gyrus                                  | 0.00 | 0.00   | 0.00 | 0.00 | 0.00 |
| Right temporal fusiform cortex, anterior division    | 0.00 | 0.00   | 0.00 | 0.00 | 0.00 |
| Right temporal occipital fusiform cortex             | 0.00 | 0.00   | 0.00 | 0.00 | 0.00 |
| Right occipital fusiform gyrus                       | 0.00 | 0.00   | 0.00 | 0.00 | 0.00 |
| Right supracalcarine cortex                          | 0.00 | 0.00   | 0.00 | 0.00 | 0.00 |
| Right occipital pole                                 | 0.00 | 0.00   | 0.00 | 0.00 | 0.00 |
| Right accumbens                                      | 0.00 | 0.00   | 0.00 | 0.00 | 0.00 |
| Left temporal fusiform cortex, posterior division    | 0.00 | 0.00   | 0.00 | 0.00 | 0.00 |
| Left inferior temporal gyrus, temporo-occipital part | 0.00 | 0.00   | 0.00 | 0.00 | 0.00 |
| Left forceps minor                                   | 0.00 | 0.00   | 0.00 | 0.00 | 0.00 |
| Left superior frontal gyrus                          | 0.00 | 0.00   | 0.00 | 0.00 | 0.00 |
| Left superior temporal gyrus, posterior division     | 0.00 | 0.00   | 0.00 | 0.00 | 0.00 |
| Left intracalcarine cortex                           | 0.00 | 0.00   | 0.00 | 0.00 | 0.00 |
| Left frontal medial cortex                           | 0.00 | 0.00   | 0.00 | 0.00 | 0.00 |
| Left juxtapositional lobule cortex                   | 0.00 | 0.00   | 0.00 | 0.00 | 0.00 |
| Left paracingulate gyrus                             | 0.00 | 0.00   | 0.00 | 0.00 | 0.00 |
| Left cingulate gyrus, anterior division              | 0.00 | 0.00   | 0.00 | 0.00 | 0.00 |
| Left cingulate gyrus, posterior division             | 0.00 | 0.00   | 0.00 | 0.00 | 0.00 |
| Left precuneus cortex                                | 0.00 | 0.00   | 0.00 | 0.00 | 0.00 |
| Left cuneal cortex                                   | 0.00 | 0.00   | 0.00 | 0.00 | 0.00 |
| Left parahippocampal gyrus, posterior division       | 0.00 | 0.00   | 0.00 | 0.00 | 0.00 |
| Left lingual gyrus                                   | 0.00 | 0.00   | 0.00 | 0.00 | 0.00 |
| Left temporal fusiform cortex, anterior division     | 0.00 | 0.00   | 0.00 | 0.00 | 0.00 |
| Left temporal occipital fusiform cortex              | 0.00 | 0.00   | 0.00 | 0.00 | 0.00 |
| Left occipital fusiform gyrus                        | 0.00 | 0.00   | 0.00 | 0.00 | 0.00 |
| Left supracalcarine cortex                           | 0.00 | 0.00   | 0.00 | 0.00 | 0.00 |
| Left occipital pole                                  | 0.00 | 0.00   | 0.00 | 0.00 | 0.00 |

**Note:**—Min indicates minimum; Max, maximum.

<sup>a</sup> Mean, median, minimum, maximum, and SD of *t*-scores calculated for each anatomic ROI provided by the Harvard-Oxford cortical and subcortical structural atlas and Johns Hopkins University International Consortium of Brain Mapping Diffusion Tensor-81 white matter labels.

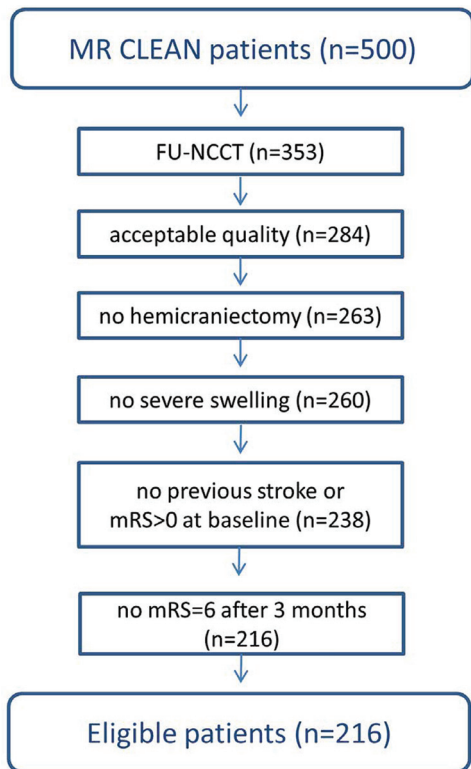

**ON-LINE FIG 1.** Flow diagram showing the exclusion of patients.

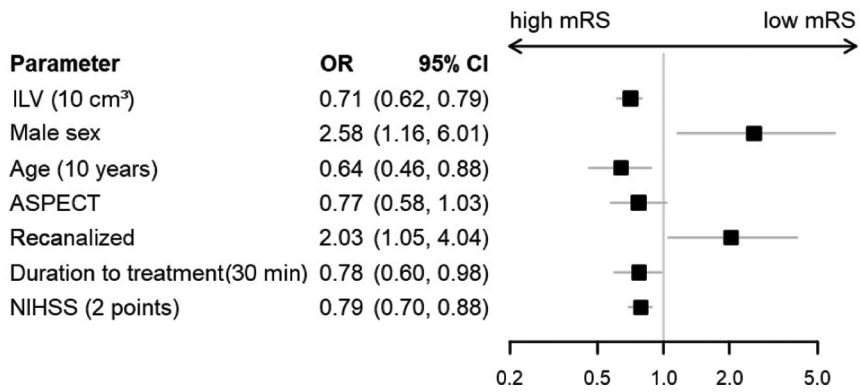

**ON-LINE FIG 2.** Odds ratios and confidence intervals of the variables in the final model of backward stepwise regression analysis.

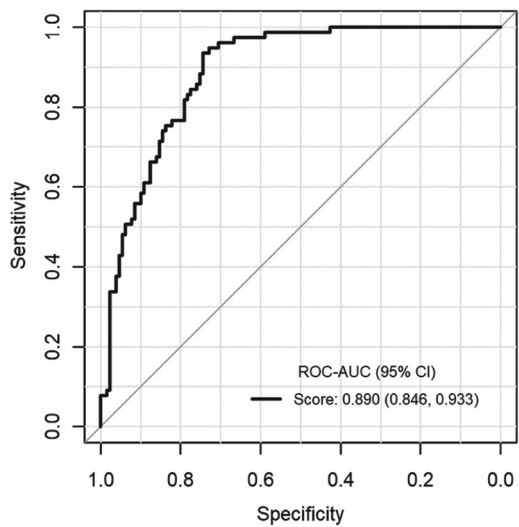

**ON-LINE FIG 3.** Discriminative power of the final regression model.

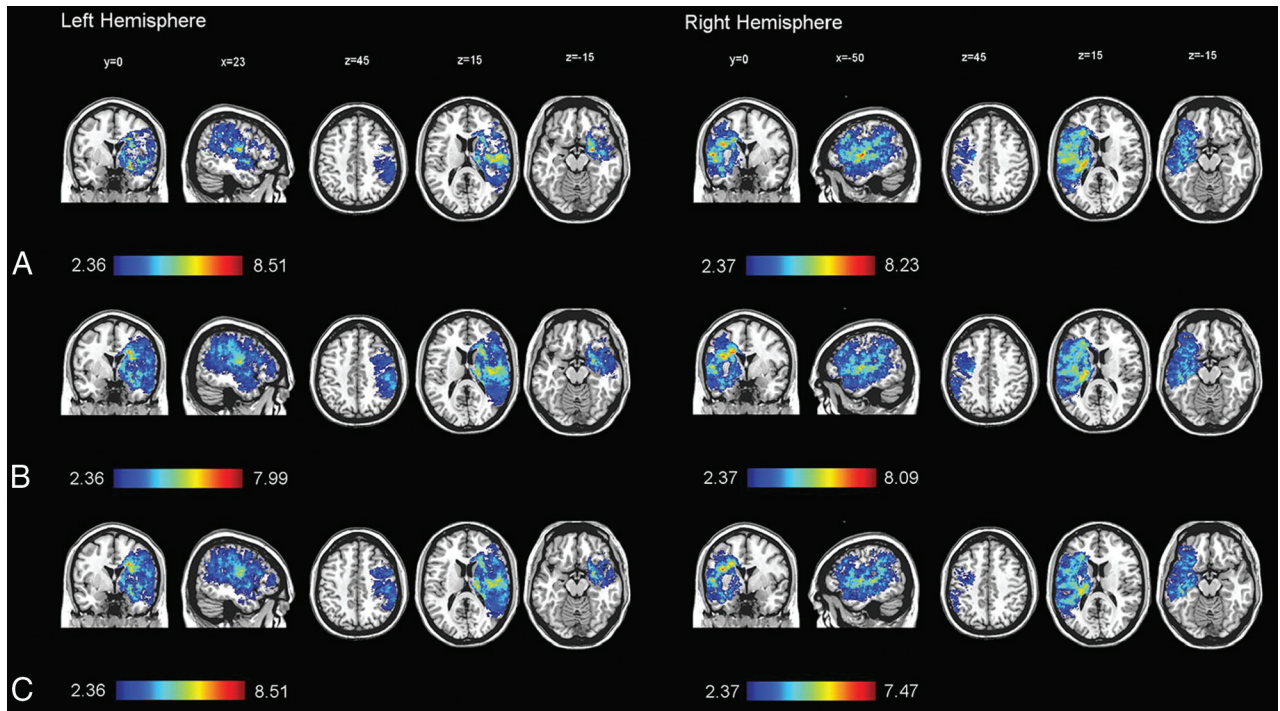

**ON-LINE FIG 4.** Voxel-based lesion-symptom mapping of lesion impact on the modified Rankin Scale score calculated separately for each hemisphere (*right side, n = 94; left side, n = 122*) using sex, age, and recanalization status (*A*); sex, age, and time to treatment (*B*); and sex, age, and NIHSS score (*C*) as covariates. The color range indicates *t*-scores thresholded at a 1% false discovery rate. Higher *t*-scores (red) indicate areas strongly associated with functional outcome (mRS).
